# Supplementary material for: Phenotypic Variation in Flower Color and Morphology in the Gerbera (Gerbera hybrida) F1 Hybrid Population and Their Association with EST-SSR Markers
Source: MDPI journal article supplement (doi:10.3390/ijms25010203), 2023-12-22
Supplement: s1 [file s1]

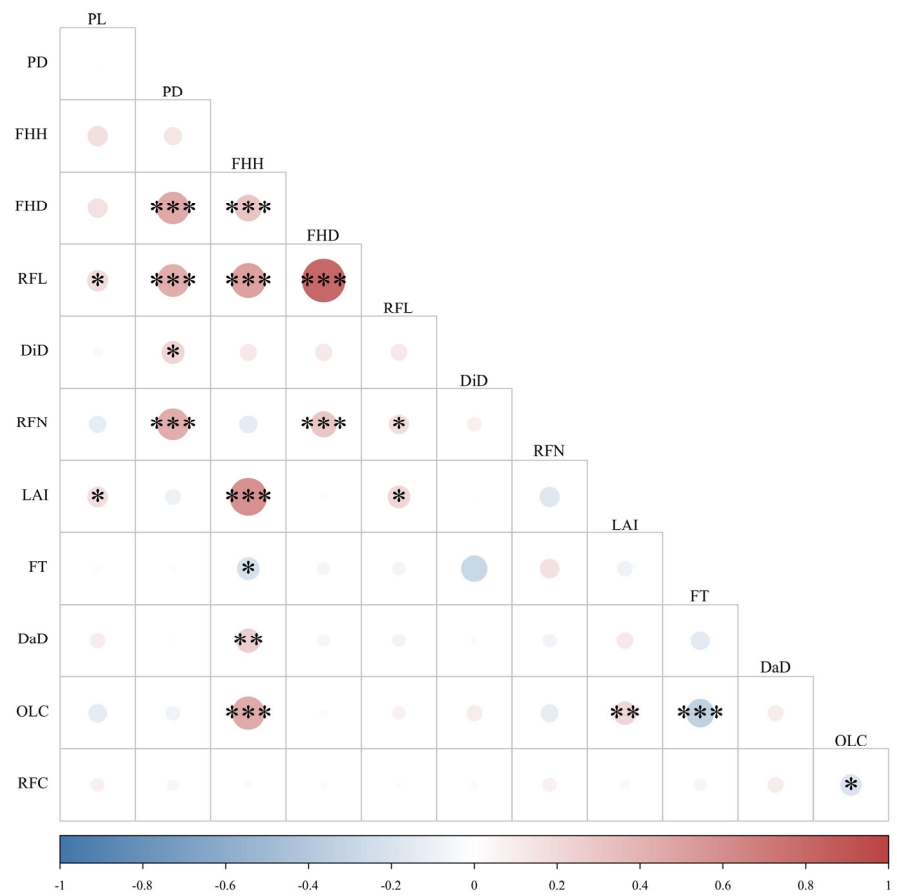

**Figure S1.** Pearson correlation analysis among 12 traits.

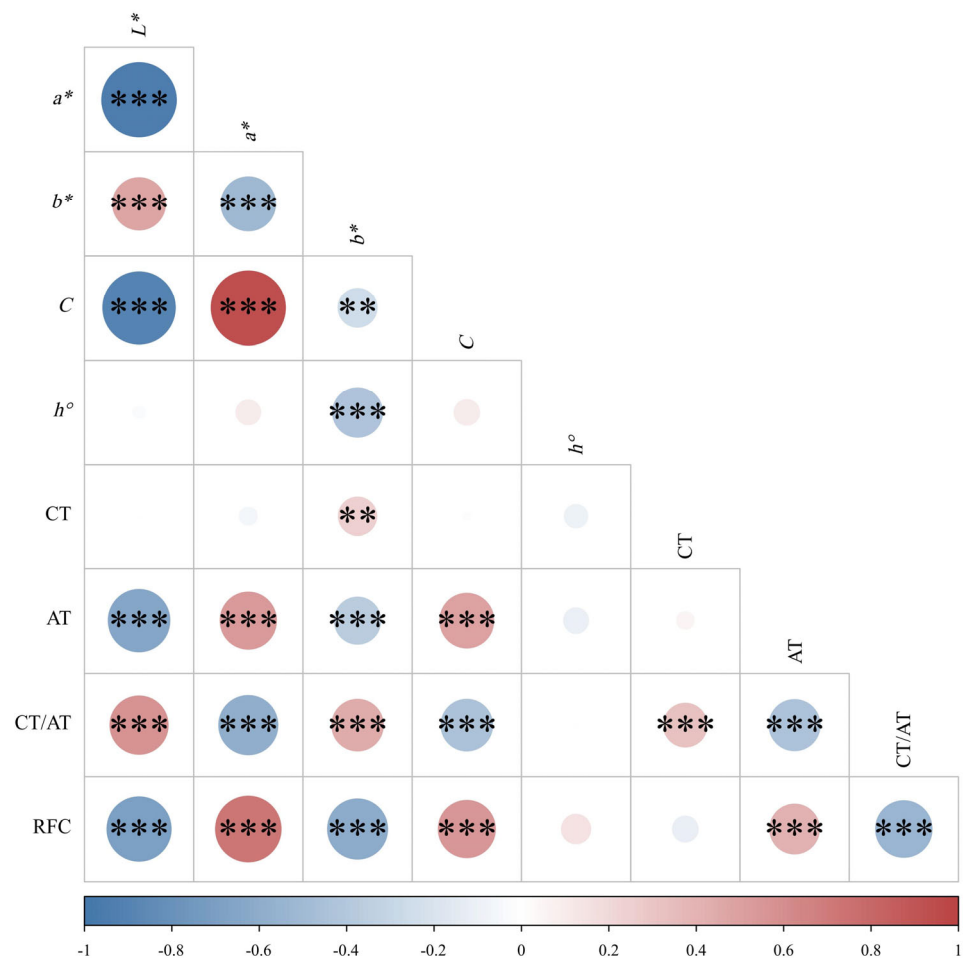

**Figure S2.** Pearson correlation analysis among  $L^*$ ,  $a^*$ ,  $b^*$ ,  $C$ ,  $h^\circ$ , CT, AT, CT/AT and RFC.

## GEM57

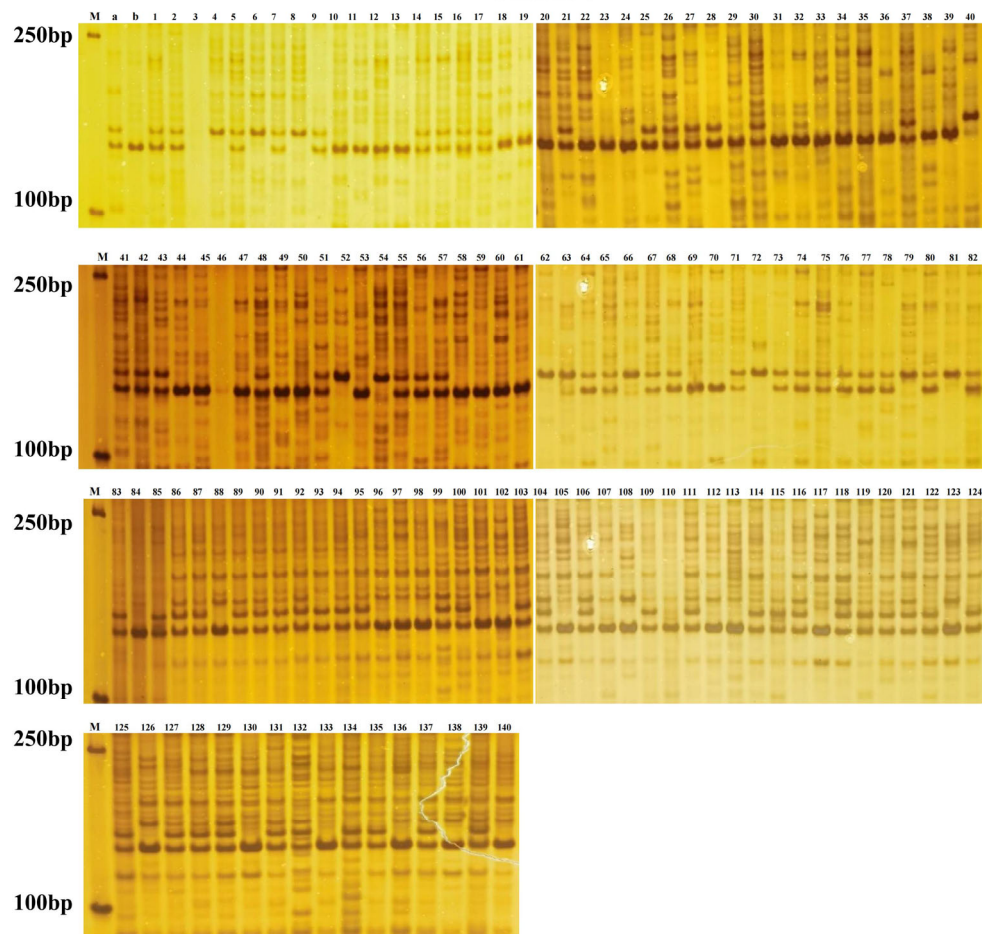

Figure S3. PAGE result of GEM57 primer.

GEM148

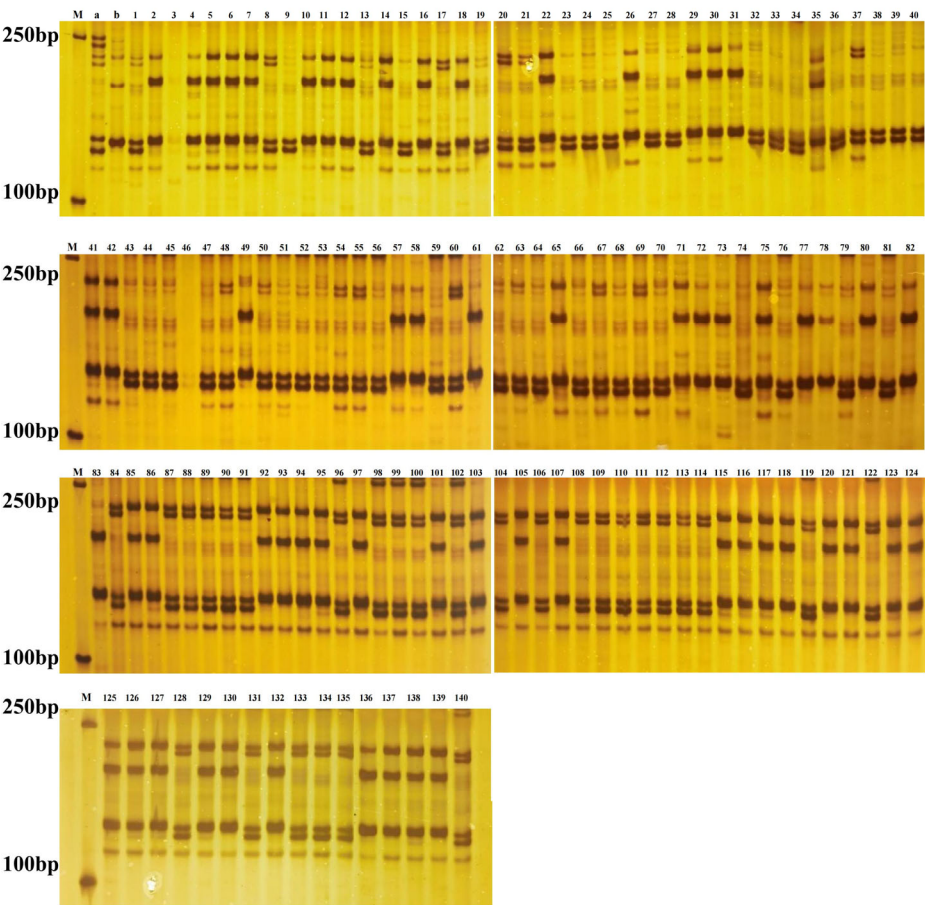

Figure S4. PAGE result of GEM148 primer.

## GEM201

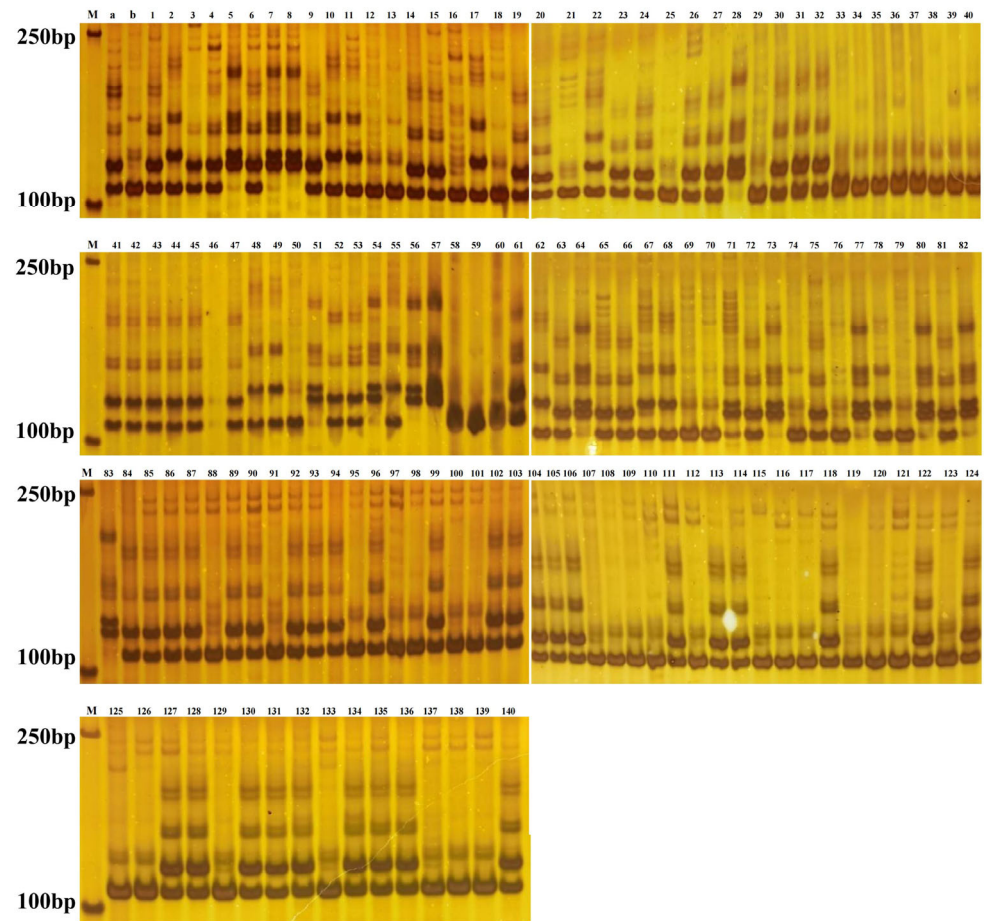

Figure S5. PAGE result of GEM201 primer.

## GEM203

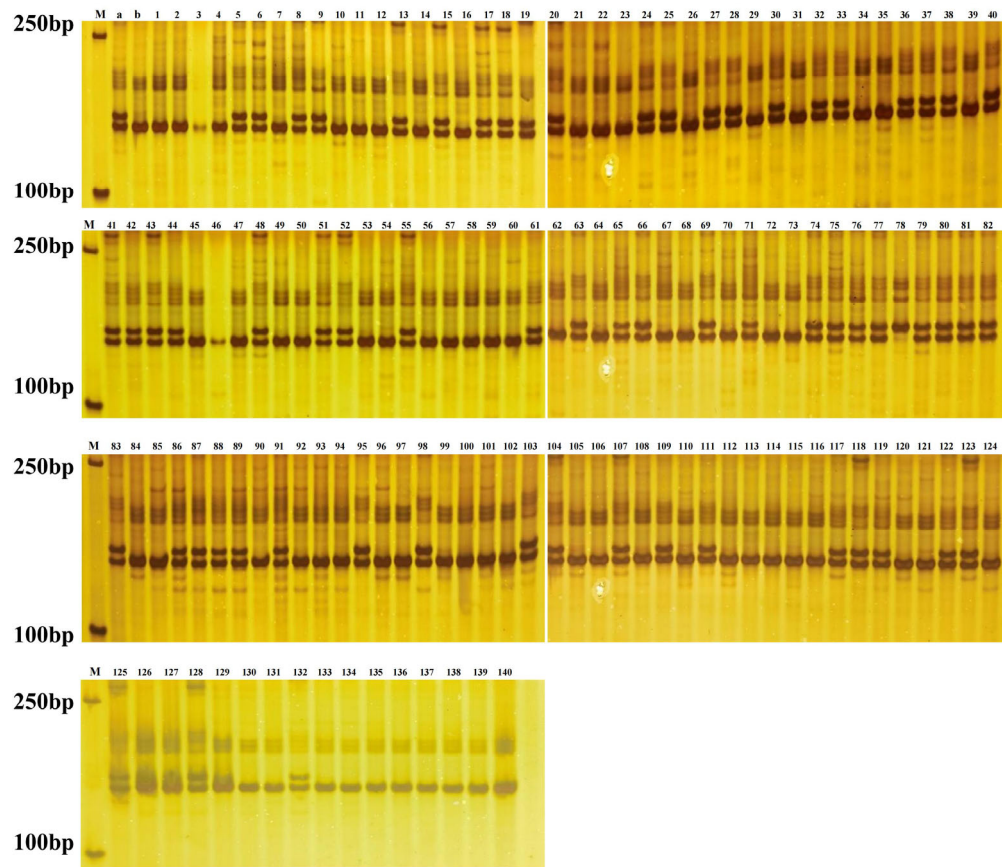

Figure S6. PAGE result of GEM203 primer.



## P3-19

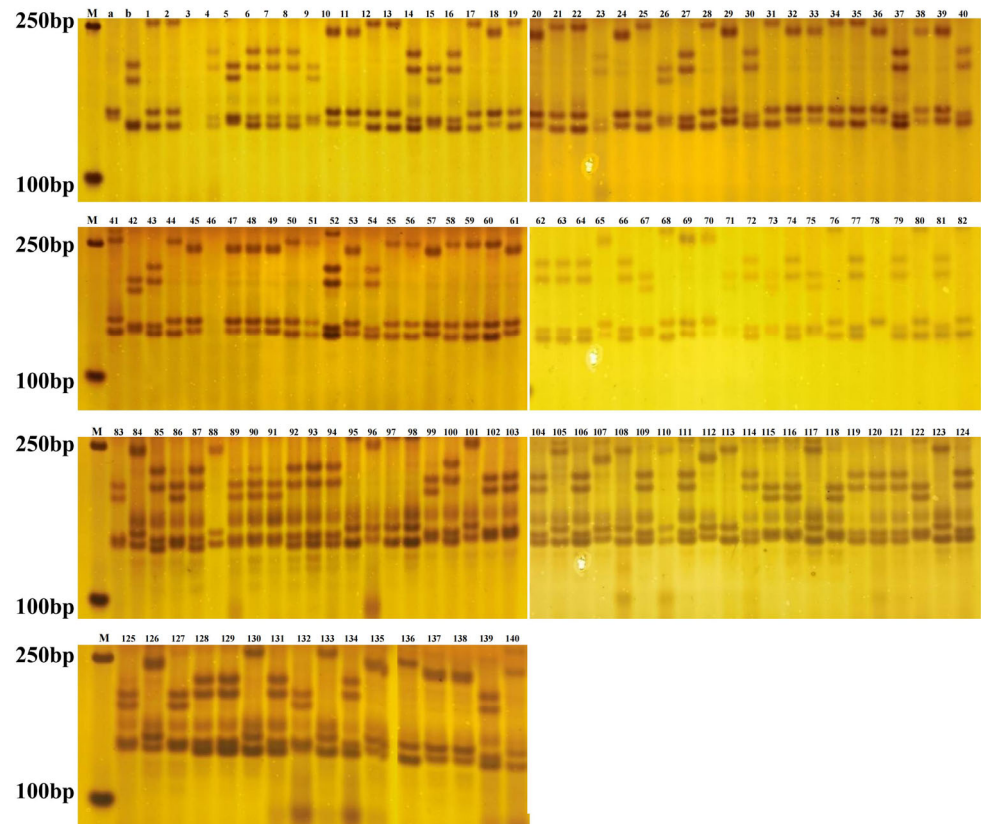

Figure S7. PAGE result of P3-19 primer.
